# Supplementary material for: Massively parallel nanowell-based single-cell gene expression profiling
Source: PubMed Central journal article supplement (PMC5501953; doi:10.1186/s12864-017-3893-1), 2017-07-07

Fig. S1

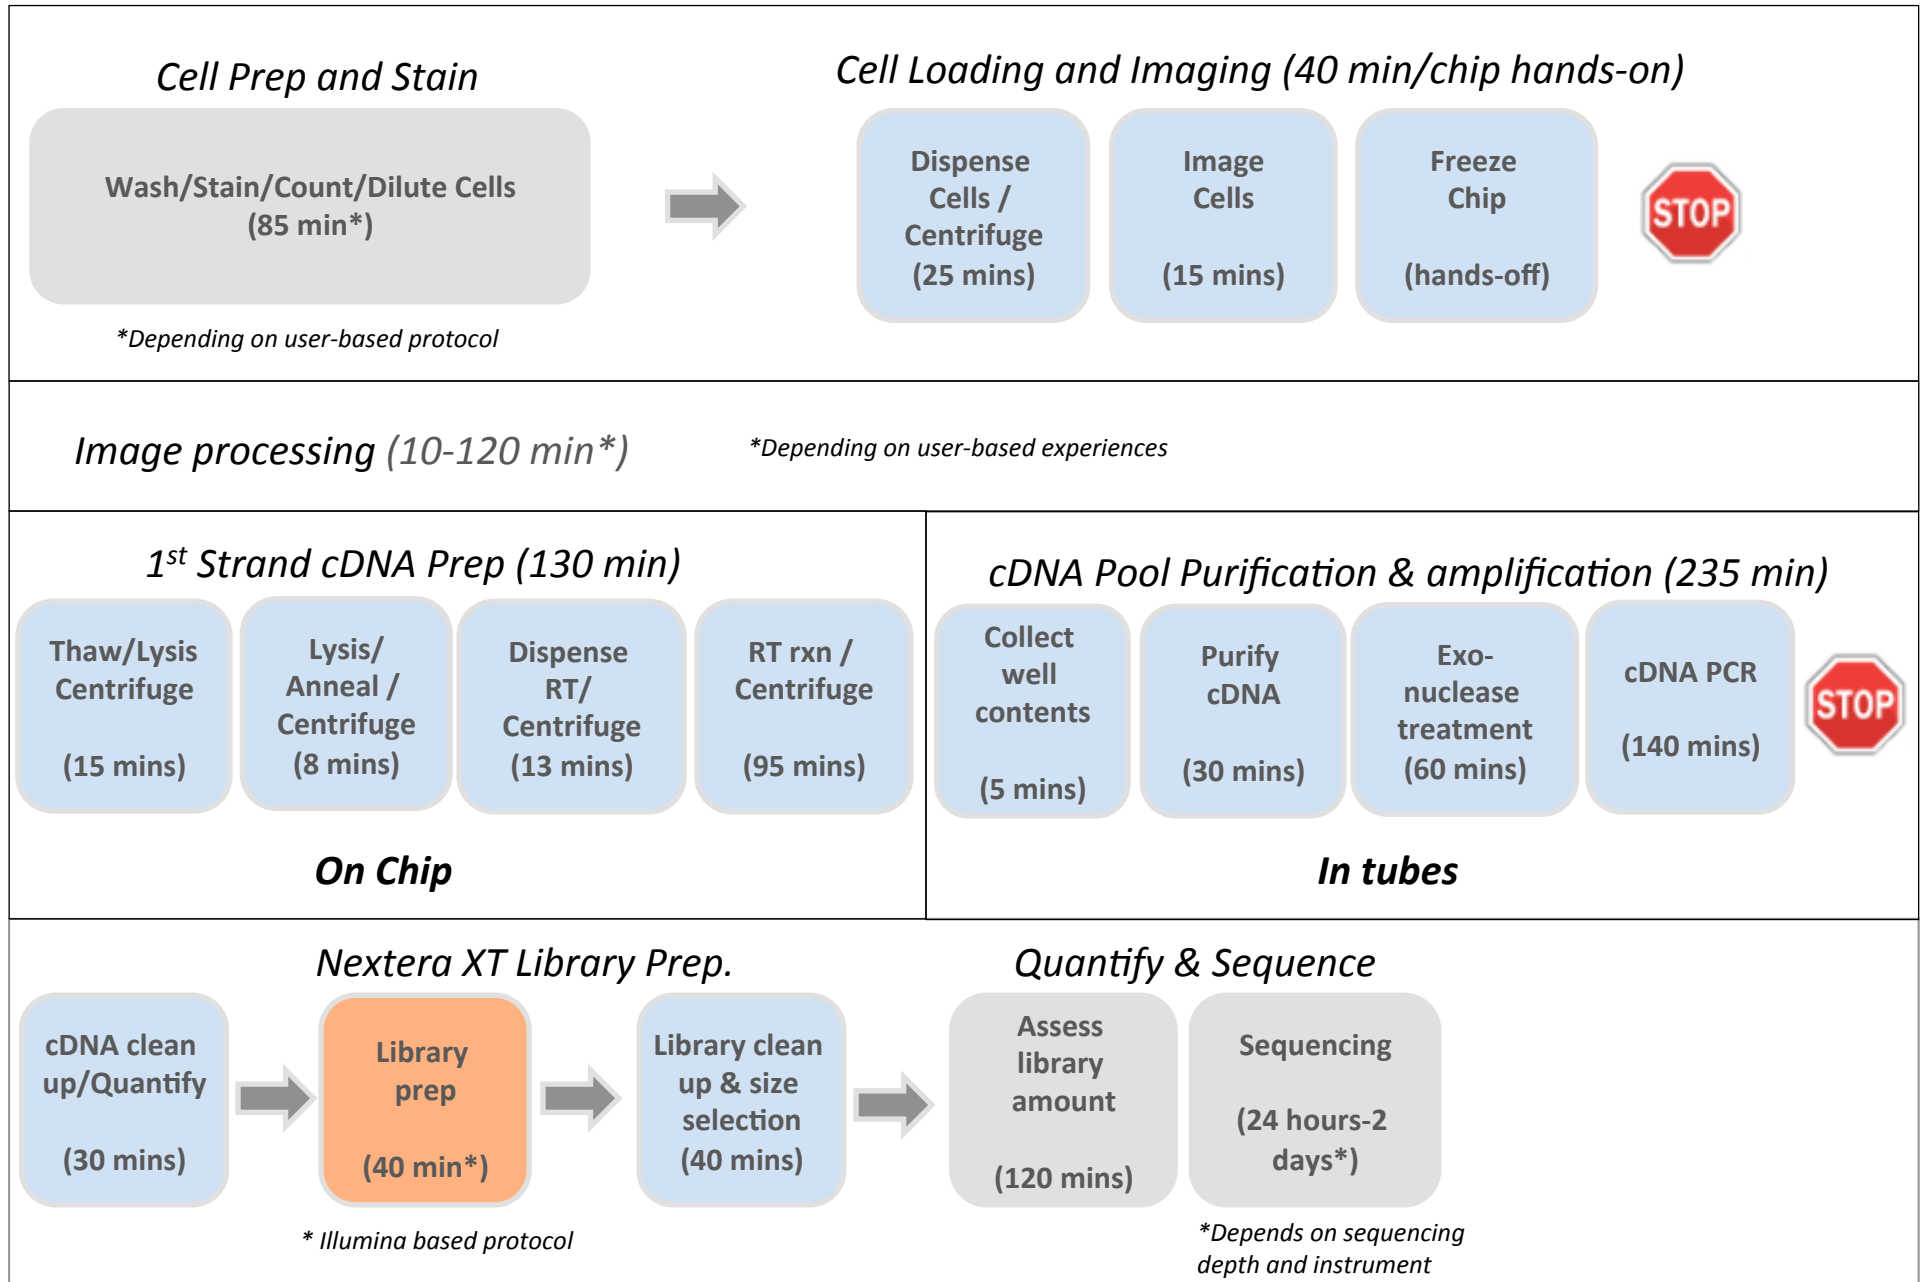

Supplement: 12864_2017_3893_MOESM1_ESM.pdf [file 12864_2017_3893_MOESM1_ESM.pdf]
